# Supplementary material for: Size-dependent response of foraminiferal calcification to seawater carbonate chemistry
Source: Copernicus journal article supplement (doi:10.5194/bg-14-3287-2017), 2017-07-10
Supplement: Supplementary file 1 [file bg-2016-459-supplement.pdf › bg-2016-459-supplement.pdf]

Supplementary Materials to accompany:  
*“Size-dependent response of foraminiferal calcification to seawater carbonate chemistry”*  
by Henahan, Evans *et al.*

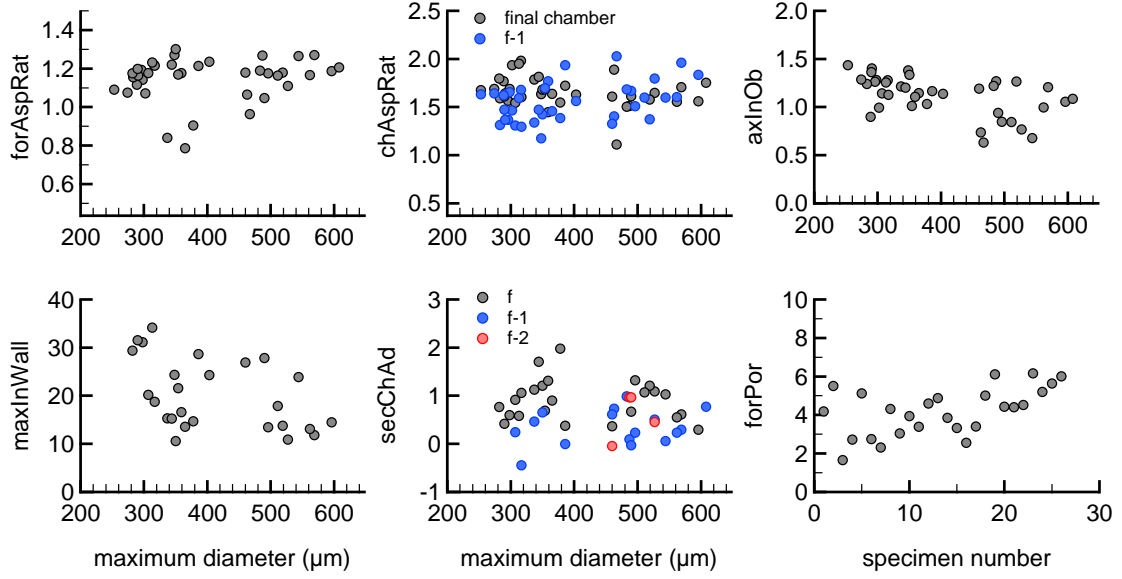

**Figure S1:** Measurements of *G. ruber* used to constrain the initial model parameters. These are based on core-top *G. ruber* from the equatorial Atlantic; see main text Section 2.4.1 for full description. Because we observe no significant trend in any of these parameters as a function of size, we use the mean of all measurements to derive the numbers stated in the main text Table 1. Accurate measurements of test diameter were not available for samples used to measure porosity ('forPor', bottom right panel), which are instead plotted against specimen number. We note that these specimens span a smaller size range than those from which the other measurements were taken (250-425  $\mu\text{m}$ ), so we cannot constrain possible ontogenetic changes in porosity based on this dataset. See main text Table 2 for definitions.

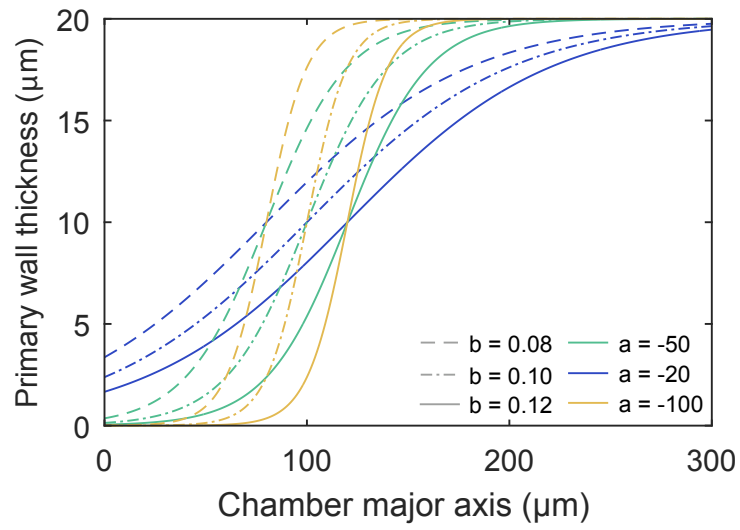

**Figure S2:** Schematic illustration of the effect of constants  $a$  and  $b$  on the relationship between wall thickness and test size.

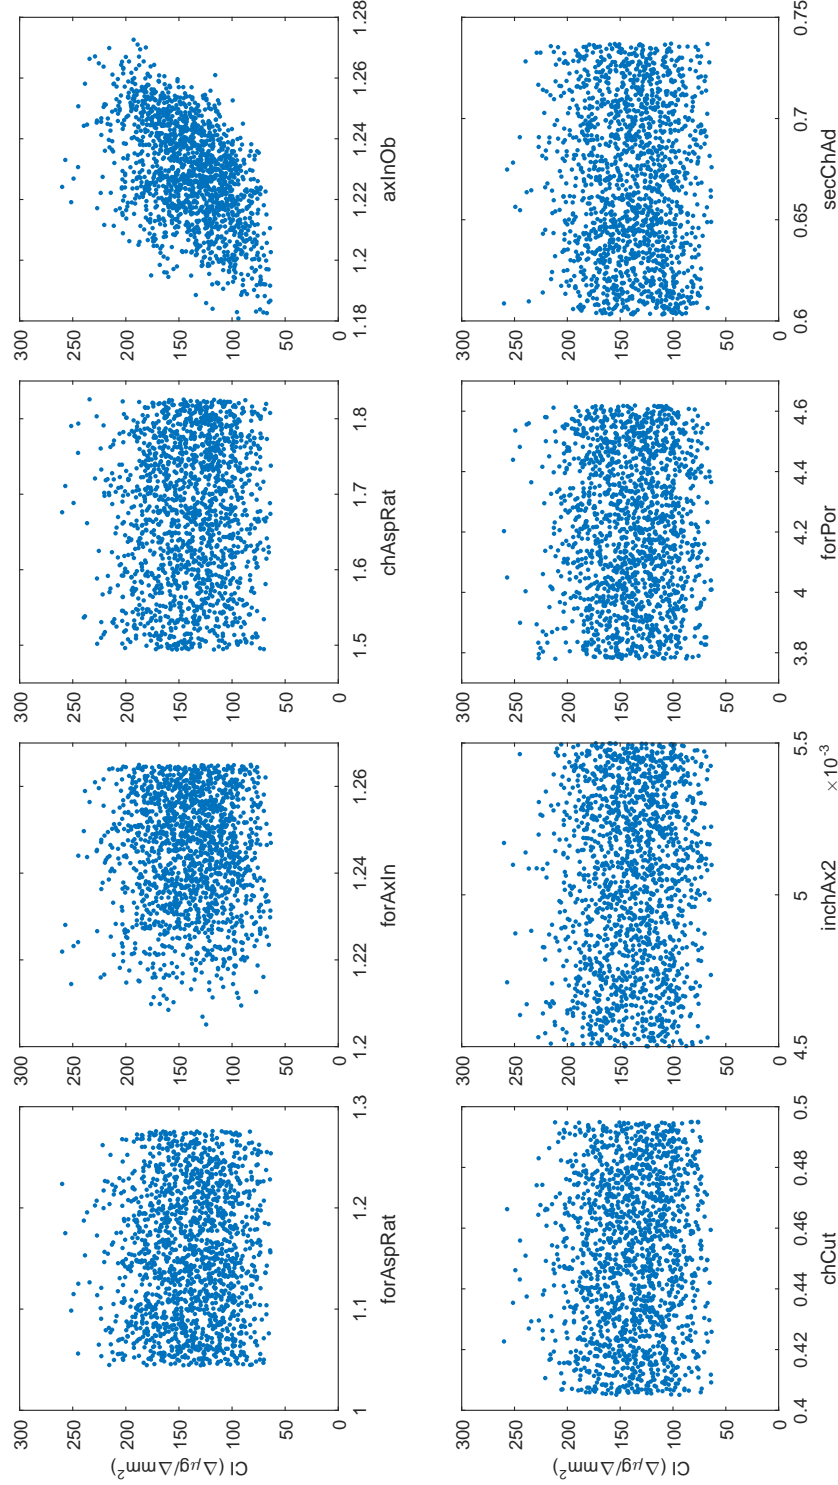

**Figure S3:** Relationship between model CI and input parameters. Model parameters were allowed to vary randomly and independently of each other. The relationship between modelled CI against all input parameters is plotted (at a body size of  $\sim 0.1 \text{ mm}^2$ , for the case of two chamber additions). None of these parameters alone drives CI, which as we discuss in the main text, has the implication that a change in one may be offset by a change in another (that shifts CI in the opposite direction) in order to produce foraminifera that conform – within tolerances – to the observed size-weight relationship for this species. This leaves wall thickness to dominate CI change, with the possible exception of ‘axInOb’, which is the ratio of the major axis of any given chamber to the major axis of the chamber that proceeded it. See main text Table 2 for parameter descriptions.

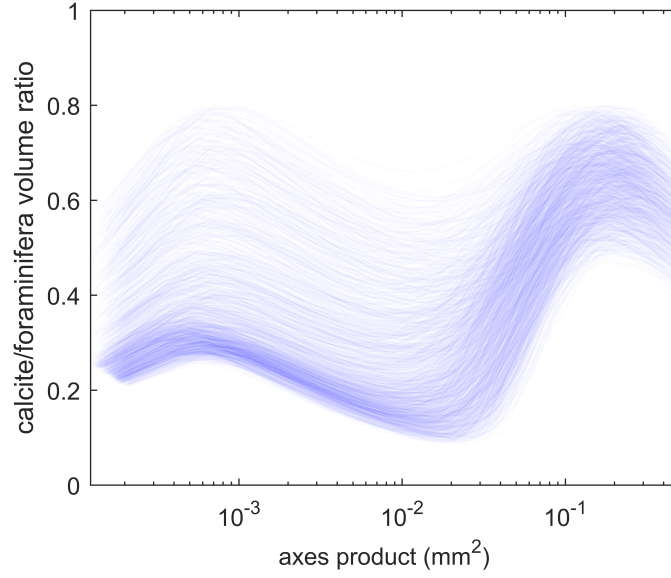

**Figure S4:** Modelled variation in volume-normalised mass through ontogeny. Main text Section 4.2 deals with the complication associated with using size-normalised shell weight of foraminifera from wide size fractions to reconstruct calcification, namely that doing so assumes no dependency of such metrics on body size which we demonstrate is unlikely to be the case. It has similarly been suggested that volume normalisation may be used to reconstruct past changes in calcification (Foster *et al.*, 2013). As a comparative exercise, this figure shows the model output of the evolution of the foraminifer calcite volume/total volume ratio through ontogeny. The majority of models predict that this ratio changes substantially over the body size range of interest, indicating that volume normalisation is unlikely to be a useful metric of calcification unless measured on samples of equivalent size/ontogeny.

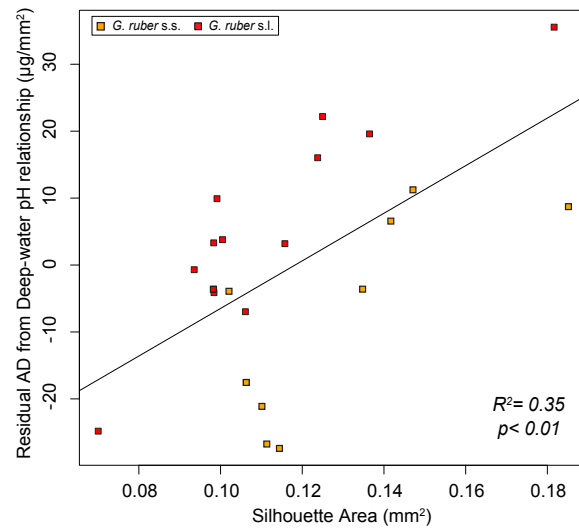

**Figure S5:** Residual variation in  $\rho_A$  around the relationship with deep ocean pH is significantly correlated with test silhouette area ( $R^2=0.35$ ,  $p < 0.01$ ).

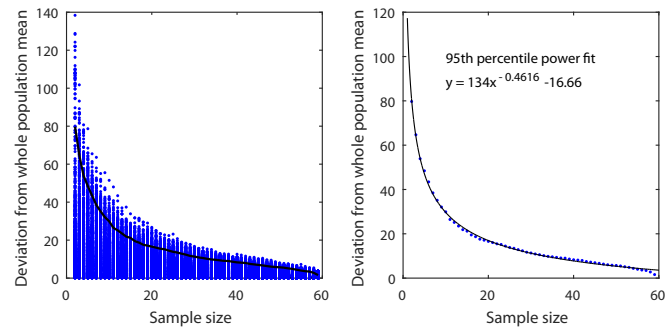

**Figure S6:** The relationship used to calculate our bounds of uncertainty on culture CI data. With repeated subsamples from a large population of cultured individuals, the deviation of the mean of that subsample from the true mean was calculated. This allowed us to consider the effect sampling small numbers from a population with a large degree of inter-individual variability.

**Table S1:** Measurements of *G. ruber* used to constrain the initial model parameters. See main text table 1 for definitions. Numbers are dimensionless except where stated. f, f-1 and f-2 refer to the final, penultimate and antepenultimate chambers respectively.

| ax <sub>1</sub><br>( $\mu\text{m}$ ) | forAspRat | chAspRat<br>(f) | chAspRat<br>(f-1) | axInOb | wallTh<br>( $\mu\text{m}$ ) | secChAd<br>(f) | secChAd<br>(f-1) | secChAd<br>(f-2) |
|--------------------------------------|-----------|-----------------|-------------------|--------|-----------------------------|----------------|------------------|------------------|
| 569                                  | 1.27      | 1.71            | 1.96              | 1.21   | 11.8                        | 0.61           | 0.30             |                  |
| 365                                  | 0.79      | 1.64            | 1.46              | 1.15   | 13.5                        | 0.90           |                  |                  |
| 487                                  | 1.27      | 1.51            |                   | 1.27   |                             |                | 0.09             | 0.97             |
| 527                                  | 1.11      | 1.65            | 1.80              | 0.77   | 10.9                        | 1.09           | 0.50             | 0.45             |
| 463                                  | 1.06      | 1.89            | 1.40              | 0.74   |                             |                | 0.73             |                  |
| 490                                  | 1.05      | 1.61            | 1.67              | 0.94   | 27.8                        | 0.67           | -0.03            | 0.97             |
| 460                                  | 1.18      | 1.61            | 1.33              | 1.19   | 26.9                        | 0.36           | 0.61             | -0.04            |
| 519                                  | 1.18      | 1.58            | 1.37              | 1.27   | 13.8                        | 1.21           |                  |                  |
| 467                                  | 0.96      | 1.11            | 2.03              | 0.63   |                             |                |                  |                  |
| 378                                  | 0.90      | 1.55            | 1.39              | 1.03   | 14.7                        | 1.98           |                  |                  |
| 302                                  | 1.07      | 1.93            | 1.47              | 0.99   |                             |                |                  |                  |
| 298                                  | 1.14      | 1.69            | 1.65              | 1.28   | 31.1                        | 0.60           |                  |                  |
| 289                                  | 1.12      | 1.77            | 1.62              | 0.90   |                             |                |                  |                  |
| 253                                  | 1.09      | 1.68            | 1.63              | 1.43   |                             |                |                  |                  |
| 296                                  | 1.19      | 1.57            | 1.37              | 1.26   |                             |                |                  |                  |
| 283                                  | 1.16      | 1.59            | 1.31              | 1.24   |                             |                |                  |                  |
| 348                                  | 1.27      | 1.64            | 1.18              | 1.38   | 24.3                        |                |                  |                  |
| 307                                  | 1.18      | 1.55            | 1.31              | 1.14   | 20.2                        | 0.91           | 0.24             |                  |
| 274                                  | 1.07      | 1.69            | 1.64              | 1.29   |                             |                |                  |                  |
| 316                                  | 1.22      | 1.98            | 1.68              | 1.28   |                             |                |                  |                  |
| 291                                  | 1.16      | 1.64            | 1.37              | 1.40   |                             |                |                  |                  |
| 317                                  | 1.21      | 1.60            | 1.30              | 1.13   | 18.8                        | 1.06           | -0.44            |                  |
| 350                                  | 1.30      | 1.68            | 1.43              | 1.34   | 10.6                        | 1.21           | 0.66             |                  |
| 282                                  | 1.18      | 1.80            |                   |        | 29.4                        | 0.77           |                  |                  |
| 313                                  | 1.23      | 1.95            | 1.59              | 1.25   | 34.2                        | 0.58           |                  |                  |
| 290                                  | 1.20      | 1.61            | 1.47              | 1.36   | 31.5                        | 0.42           |                  |                  |
| 386                                  | 1.21      | 1.72            | 1.94              | 1.17   | 28.7                        | 0.38           | -0.01            |                  |
| 337                                  | 0.84      | 1.79            | 1.34              | 1.21   | 15.3                        | 1.13           | 0.46             |                  |
| 344                                  | 1.22      | 1.82            | 1.47              | 1.20   | 15.2                        | 1.71           |                  |                  |
| 403                                  | 1.24      | 1.63            | 1.56              | 1.14   | 24.3                        |                |                  |                  |
| 359                                  | 1.18      | 1.45            | 1.77              | 1.11   | 16.6                        | 1.31           |                  |                  |
| 354                                  | 1.17      | 1.68            | 1.70              | 1.01   | 21.6                        | 0.69           |                  |                  |
| 496                                  | 1.18      |                 | 1.51              | 0.85   | 13.4                        | 1.32           | 0.23             |                  |
| 544                                  | 1.27      |                 | 1.60              | 0.68   | 23.9                        | 1.03           | 0.06             |                  |
| 511                                  | 1.16      |                 | 1.60              | 0.85   | 17.8                        | 1.07           |                  |                  |
| 596                                  | 1.19      | 1.56            | 1.83              | 1.06   | 14.5                        | 0.30           |                  |                  |
| 608                                  | 1.21      | 1.75            |                   | 1.09   |                             |                | 0.77             |                  |
| 483                                  | 1.19      | 1.50            | 1.68              | 1.22   |                             |                | 0.99             |                  |
| 562                                  | 1.17      | 1.56            | 1.61              | 1.00   | 13.1                        | 0.55           | 0.23             |                  |

**Table S2:** Core-top shell weight measurements, with *in situ* carbonate system estimates. Deepwater saturation and pH is derived from Goyet *et al.* (2000), calculated from bathymetry, dissolved inorganic carbon concentrations and total alkalinity using van Heuven *et al.* (2011).

| Site      | Lat.<br>(°N) | Long.<br>(°E) | Species  | Sieve<br>Size<br>Fraction<br>( $\mu\text{m}$ ) | <i>n</i> | Mean<br>$\rho_A$<br>( $\mu\text{g}/\text{mm}^{-2}$ ) | $\pm 2\text{sd}$ | Mean<br>Silhou-<br>ette<br>Area | $\pm 2\text{sd}$ | Surface<br>pH | $\pm 2\text{sd}$ | Deep<br>water<br>pH | Deep<br>water<br>$\Omega_{\text{calcite}}$ |
|-----------|--------------|---------------|----------|------------------------------------------------|----------|------------------------------------------------------|------------------|---------------------------------|------------------|---------------|------------------|---------------------|--------------------------------------------|
| MC497     | 23.53        | 63.31         | ruber ss | 250-300                                        | 25       | 72.4                                                 | 26.0             | 0.114                           | 0.032            | 8.156         | 0.020            | 7.726               | 1.46                                       |
| MC423     | 17.75        | -65.59        | ruber sl | 250-300                                        | 26       | 129.4                                                | 35.2             | 0.098                           | 0.025            | 8.174         | 0.011            | 7.969               | 1.74                                       |
| MC423     | 17.75        | -65.59        | ruber sl | 250-300                                        | 26       | 129.9                                                | 10.5             | 0.098                           | 0.025            | 8.174         | 0.011            | 7.969               | 1.74                                       |
| MC423     | 17.75        | -65.59        | ruber ss | 250-300                                        | 26       | 106.8                                                | 29.0             | 0.111                           | 0.027            | 8.174         | 0.011            | 7.969               | 1.74                                       |
| MC420     | 17.04        | -66.00        | ruber sl | 250-300                                        | 26       | 113.0                                                | 37.1             | 0.100                           | 0.021            | 8.173         | 0.013            | 7.794               | 0.78                                       |
| MC420     | 17.04        | -66.00        | ruber ss | 250-300                                        | 25       | 88.0                                                 | 45.8             | 0.110                           | 0.031            | 8.173         | 0.013            | 7.794               | 0.78                                       |
| MC577-17b | 45.57        | -17.40        | ruber sl | 250-300                                        | 26       | 116.8                                                | 31.7             | 0.094                           | 0.028            | 8.188         | 0.004            | 7.854               | 0.88                                       |
| FR1/97-   | -22.90       | 152.64        | ruber sl | 300-400                                        | 24       | 156.8                                                | 45.2             | 0.136                           | 0.030            | 8.169         | 0.013            | 7.995               | 4.06                                       |
| GC09      |              |               |          |                                                |          |                                                      |                  |                                 |                  |               |                  |                     |                                            |
| FR1/97-   | -22.90       | 152.64        | ruber ss | 300-400                                        | 20       | 148.5                                                | 72.8             | 0.147                           | 0.050            | 8.169         | 0.013            | 7.995               | 4.06                                       |
| GC09      |              |               |          |                                                |          |                                                      |                  |                                 |                  |               |                  |                     |                                            |
| Q633      | -38.46       | 148.89        | ruber sl | 250-300                                        | 25       | 90.9                                                 | 33.3             | 0.070                           | 0.028            | 8.193         | 0.001            | 7.841               | 1.15                                       |
| MC436     | 39.80        | -21.06        | ruber sl | 300-355                                        | 16       | 126.1                                                | 32.2             | 0.116                           | 0.028            | 8.201         | 0.017            | 7.892               | 0.92                                       |
| MC120     | 12.47        | 45.38         | ruber ss | 300-355                                        | 26       | 140.6                                                | 13.3             | 0.102                           | 0.031            | 8.092         | 0.068            | 8.048               | 2.98                                       |
| MC655     | 38.42        | 5.40          | ruber ss | 250-300                                        | 23       | 118.3                                                | 17.8             | 0.106                           | 0.022            | 8.161         | 0.050            | 7.985               | 2.54                                       |
| MC655     | 38.42        | 5.40          | ruber sl | 250-300                                        | 26       | 139.1                                                | 34.7             | 0.098                           | 0.025            | 8.161         | 0.050            | 7.985               | 2.54                                       |
| G4        | -28.42       | 167.25        | ruber sl | 300-355                                        | 23       | 146.5                                                | 26.8             | 0.125                           | 0.025            | 8.207         | 0.030            | 7.902               | 1.91                                       |
| J39       | -37.00       | 170.00        | ruber sl | 300-355                                        | 8        | 114.6                                                | 60.0             | 0.099                           | 0.019            | 8.188         | 0.010            | 7.762               | 1.02                                       |
| GGC48     | 0.00         | 161.00        | ruber ss | 300-355                                        | 24       | 108.1                                                | 30.5             | 0.142                           | 0.087            | 8.108         | 0.044            | 7.739               | 0.79                                       |
| GGC48     | 0.00         | 161.00        | ruber sl | 300-355                                        | 26       | 94.5                                                 | 33.9             | 0.106                           | 0.054            | 8.108         | 0.044            | 7.739               | 0.79                                       |
| T327      | -11.51       | 174.51        | ruber ss | 300-355                                        | 25       | 104.0                                                | 33.3             | 0.135                           | 0.074            | 8.159         | 0.026            | 7.783               | 1.14                                       |
| T327      | -11.51       | 174.51        | ruber sl | 300-355                                        | 25       | 123.7                                                | 29.6             | 0.124                           | 0.058            | 8.159         | 0.026            | 7.783               | 1.14                                       |
| T329      | -12.96       | 173.57        | ruber sl | 300-355                                        | 24       | 146.5                                                | 18.9             | 0.182                           | 0.050            | 8.175         | 0.023            | 7.807               | 1.68                                       |
| T329      | -12.96       | 173.57        | ruber ss | 300-355                                        | 24       | 119.7                                                | 20.4             | 0.185                           | 0.048            | 8.175         | 0.023            | 7.807               | 1.68                                       |



**Table S3:** Regression coefficients for multiple linear regression analysis of controls on area density ( $\rho_A$ ) in core-tops. Deep ocean pH, shell size (as parameterised by shell silhouette area) and species (*G. ruber* sensu stricto *vs.* sensu lato) are significant controls on area density. Note that surface ocean pH has no significant contribution to the model, and according to Akaike Information Criteria it would be removed from the model. However, we list it here for illustrative purposes to demonstrate the lack of surface ocean pH control as its inclusion does not significantly alter the other coefficients or overall model fit. Other related parameters such as  $[\text{CO}_3^{2-}]$  (Model  $R^2 = 0.69$ ) and  $\Omega_{\text{calcite}}$  (Model  $R^2 = 0.70$ ) at the site of coretops were also tested in lieu of pH, but model fits were weaker in both cases, and so pH at the site of coretop is preferred here ( $R^2=0.86$ , see below).

| Regression Coefficients:               |                       |                    |                       |   |
|----------------------------------------|-----------------------|--------------------|-----------------------|---|
|                                        | Coefficient           | S.E.               | $p$                   |   |
| (Intercept)                            | -620.21               | 562.56             | 0.29                  |   |
| Deep Ocean pH                          | 165.74                | 17.86              | $4.58 \times 10^{-8}$ | * |
| Silhouette Area ( $\text{mm}^2$ )      | 503.77                | 70.04              | $1.50 \times 10^{-6}$ | * |
| Species                                | 24.24                 | 4.13               | $1.85 \times 10^{-5}$ | * |
| Surface Ocean pH                       | -81.14                | 68.42              | 0.25                  |   |
| *indicates significance to $p < 0.001$ |                       |                    |                       |   |
| Residual standard error:               | 8.26                  | (d.f. = 17)        |                       |   |
| $R^2$ (adjusted):                      | 0.86                  |                    |                       |   |
| F-statistic:                           | 32.6                  | (on 4 and 17 d.f.) |                       |   |
| Model $p$ -value:                      | $9.06 \times 10^{-8}$ |                    |                       |   |
