# Supplementary material for: Size-dependent response of foraminiferal calcification to seawater carbonate chemistry
Source: Copernicus journal article supplement (doi:10.5194/bg-14-3287-2017), 2017-07-10
Supplement: Supplementary file [file bg-14-3287-2017-supplement-title-page.pdf › bg-14-3287-2017-supplement-title-page.pdf]

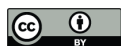

## *Supplement of*

# **Size-dependent response of foraminiferal calcification to seawater carbonate chemistry**

**Michael J. Hennehan et al.**

*Correspondence to:* Michael J. Hennehan (michael.hennehan@yale.edu) and David Evans (de32@st-andrews.ac.uk)

- bg-14-3287-2017-supplement-title-page.pdf
- .DS\_Store
- Hennehan\_et\_al\_SM\_ruber\_model.m
- bg-2016-459-supplement.pdf
- massSizeData.csv

The copyright of individual parts of the supplement might differ from the CC BY 3.0 License.
